# Supplementary material for: miR-214-3p-Sufu-GLI1 is a novel regulatory axis controlling inflammatory smooth muscle cell differentiation from stem cells and neointimal hyperplasia
Source: PubMed Central journal article supplement (PMC7640405; doi:10.1186/s13287-020-01989-w), 2020-11-03
Supplement: 13287_2020_1989_MOESM3_ESM.pdf [file 13287_2020_1989_MOESM3_ESM.pdf]

**Figure S2. SMC differentiation from AdSPCs.**

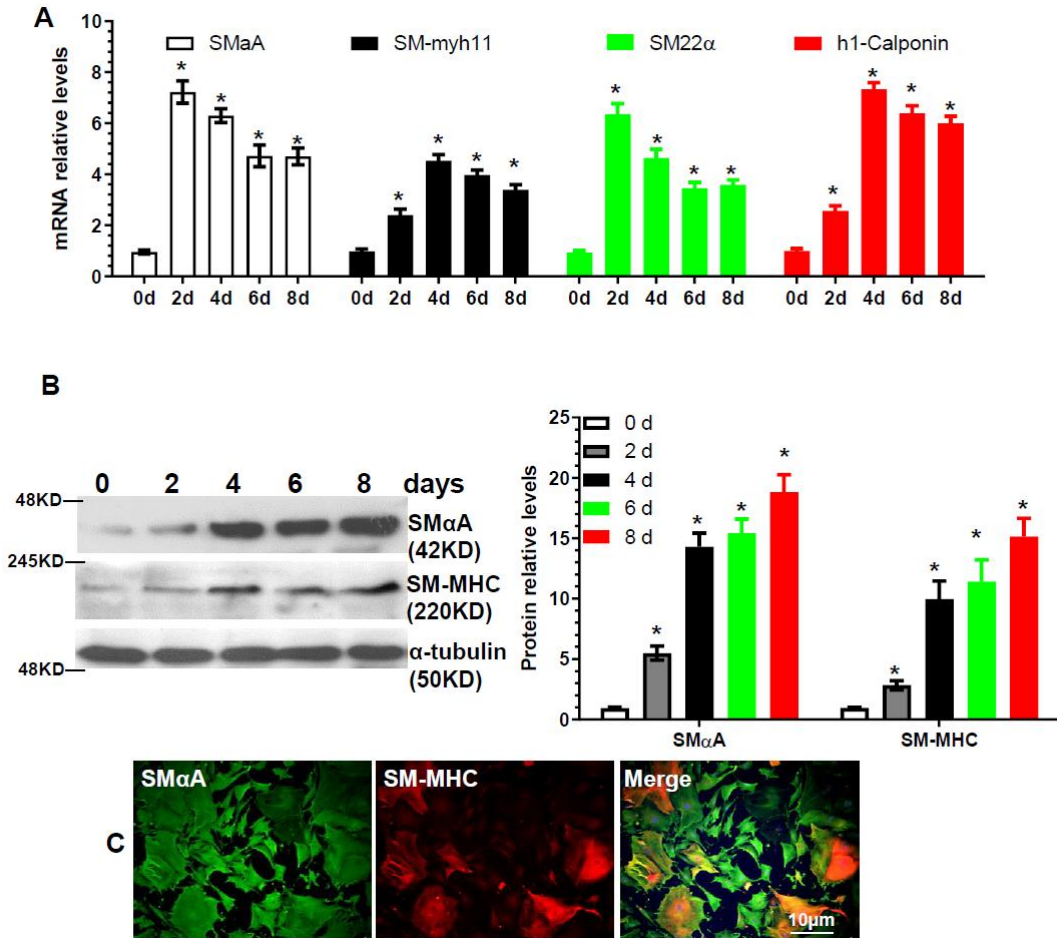

Passage 3-8 AdSPCs were cultured in SMC differentiation medium (DMEM supplemented with 5% FBS and 5ng/ml TGFβ1) for the indicated time to allow for SMC differentiation. Total RNAs and proteins from undifferentiated AdSPCs (0d) or differentiating AdSPCs at day 2, 4, 6 and 8 were harvested and subjected to RT-qPCR (A) and Western blot (B) analyses, respectively. (C) Mature SMC marker expression in AdSPC-derived SMCs. Day 8 differentiated SMCs were stained with antibodies against SMαA and SM-MHC. The data presented here are representative images (left panel in B, and C) or mean±S.E.M. (A, and right panel in B) of five independent experiments. \*P<0.05 (versus 0d, one-way ANOVA with a post hoc test of Tukey's analysis).
